# Supplementary material for: Establishing Computational Approaches Towards Identifying Malarial Allosteric Modulators: A Case Study of Plasmodium falciparum Hsp70s
Source: MDPI journal article supplement (doi:10.3390/ijms20225574), 2019-11-08
Supplement: s1 [file s1]

## *Supplementary Material*

# **Establishing computational approaches towards identifying malarial allosteric modulators: A case study of *Plasmodium falciparum* Hsp70s**

**Arnold Amusengeri <sup>1</sup>, Lindy Astl <sup>2</sup>, Kevin Lobb <sup>1,3</sup>, Gennady M. Verkhivker <sup>2,4,5</sup> and Özlem Tastan Bishop <sup>1,\*</sup>**

<sup>1</sup> Research Unit in Bioinformatics (RUBi), Department of Biochemistry and Microbiology, Rhodes University, Grahamstown, 6140, South Africa

<sup>2</sup> Graduate Program in Computational and Data Sciences, Schmid College of Science and Technology, Chapman University, Orange, CA 92866, United States of America

<sup>3</sup> Department of Chemistry, Rhodes University, Grahamstown, 6140, South Africa

<sup>4</sup> Department of Biomedical and Pharmaceutical Sciences, Chapman University School of Pharmacy, Irvine, CA 92618, United States of America

<sup>5</sup> Department of Pharmacology, Skaggs School of Pharmacy and Pharmaceutical Sciences, University of California San Diego, 9500 Gilman Drive, La Jolla, CA 92093, United States of America

\* Correspondence: [O.TastanBishop@ru.ac.za](mailto:O.TastanBishop@ru.ac.za); Tel.: +27-46-603-8072

18 **Table S1: Sequence retrieval:** Tabulated summary of homologous Hsp70 sequences  
19 retrieved from NCBI and their respective BLASTP alignment scores.

| Sequence ID           | Label     | Accession No.  | R=Reverse<br>BLAST | Total<br>Score | Query<br>Coverage | E-<br>Value | Identity |
|-----------------------|-----------|----------------|--------------------|----------------|-------------------|-------------|----------|
| PfHsp70-1             | PfHsp70-1 | XP_001349336.1 |                    | 1066           | 90%               | 0.0         | 82%      |
|                       |           |                | R                  | 1066           | 98%               | 0.0         | 77%      |
| Hsc70                 | Hsc70     | AAK17898.1     |                    | 939            | 88%               | 0.0         | 72%      |
|                       |           |                | R                  | 942            | 99%               | 0.0         | 70%      |
| <i>P.knowlesi</i>     | PKn_N     | XP_002258136.1 |                    | 1073           | 91%               | 0.0         | 82%      |
|                       |           |                | R                  | 1070           | 91%               | 0.0         | 82%      |
| <i>P.maliarae</i>     | PMa_N     | SBS82885.1     |                    | 1063           | 91%               | 0.0         | 81%      |
|                       |           |                | R                  | 1060           | 90%               | 0.0         | 81%      |
| <i>P.Ovale</i>        | POv_N     | SBT32251.1     |                    | 1060           | 90%               | 0.0         | 81%      |
|                       |           |                | R                  | 1057           | 91%               | 0.0         | 81%      |
| <i>P.vivax</i>        | PVi_N     | XP0016149721.1 |                    | 1067           | 90%               | 0.0         | 82%      |
|                       |           |                | R                  | 1064           | 90%               | 0.0         | 81%      |
| <i>P.reichenowi</i>   | Pre_N     | KYN99383.1     |                    | 1375           | 100%              | 0.0         | 98%      |
|                       |           |                | R                  | 1375           | 100%              | 0.0         | 98%      |
| <i>P.gaboni</i>       | PGa_N     | KYO00892.1     |                    | 1319           | 100%              | 0.0         | 95%      |
|                       |           |                | R                  | 1340           | 100%              | 0.0         | 95%      |
| <i>P.berghei</i>      | PBe_N     | AAL34314.1     |                    | 1067           | 91%               | 0.0         | 81%      |
|                       |           |                | R                  | 1063           | 90%               | 0.0         | 81%      |
| <i>H.hammondi</i>     | Hha_P     | XP_008882675.1 |                    | 1027           | 90%               | 0.0         | 79%      |
|                       |           |                | R                  | 1024           | 91%               | 0.0         | 79%      |
| <i>N. caninum</i>     | NCa_      | XP_003883640.1 |                    | 1027           | 90%               | 0.0         | 79%      |
|                       |           |                | R                  | 1023           | 91%               | 0.0         | 79%      |
| <i>T. gondii</i>      | TGo_P     | AAC72001.1     |                    | 1024           | 89%               | 0.0         | 79%      |
|                       |           |                | R                  | 1024           | 91%               | 0.0         | 79%      |
| <i>E.maxima</i>       | Ema_P     | XP_013334490.1 |                    | 1019           | 89%               | 0.0         | 78%      |
|                       |           |                | R                  | 1025           | 99%               | 0.0         | 76%      |
| <i>E.necatrix</i>     | ENe_P     | XP_013439452.1 |                    | 1017           | 89%               | 0.0         | 78%      |
|                       |           |                | R                  | 1026           | 94%               | 0.0         | 78%      |
| <i>C.cayetanensis</i> | CCa_P     | AAO66452.5     |                    | 1014           | 90%               | 0.0         | 77%      |
|                       |           |                | R                  | 1014           | 98%               | 0.0         | 77%      |
| <i>M. daphnieae</i>   | MDa_P     | XP_013237595.1 |                    | 885            | 94%               | 0.0         | 66%      |
|                       |           |                | R                  | 891            | 99%               | 0.0         | 66%      |
| <i>D.discoedium</i>   | DDi_N     | XP_646617.1    |                    | 924            | 89%               | 0.0         | 72%      |
|                       |           |                | R                  | 922            | 95%               | 0.0         | 72%      |
| <i>A.subglobosum</i>  | ASu_N     | XP_012749557.1 |                    | 914            | 89%               | 0.0         | 72%      |
|                       |           |                | R                  | 913            | 94%               | 0.0         | 72%      |
| <i>D.purpureum</i>    | DPu_P     | XP_003291509.1 |                    | 914            | 89%               | 0.0         | 73%      |
|                       |           |                | R                  | 914            | 95%               | 0.0         | 73%      |
| <i>D.fasciculatum</i> | DFa_P     | XP_004350535.1 |                    | 913            | 89%               | 0.0         | 72%      |
|                       |           |                | R                  | 910            | 95%               | 0.0         | 72%      |
| <i>D.lacteam</i>      | DLa_P     | KYR00848.1     |                    | 910            | 89%               | 0.0         | 72%      |
|                       |           |                | R                  | 911            | 94%               | 0.0         | 72%      |
| <i>M.crassus</i>      | MCr_P     | CAC69880.1     |                    | 929            | 89%               | 0.0         | 73%      |
|                       |           |                | R                  | 927            | 92%               | 0.0         | 73%      |

|                          |       |                |   |      |     |     |     |
|--------------------------|-------|----------------|---|------|-----|-----|-----|
| <i>S.histriomuscorum</i> | SHi_P | AED86994.1     |   | 928  | 90% | 0.0 | 73% |
|                          |       |                | R | 926  | 93% | 0.0 | 73% |
| <i>E.eurystomus</i>      | EEu_p | AAA99874.1     |   | 924  | 90% | 0.0 | 73% |
|                          |       |                | R | 924  | 95% | 0.0 | 73% |
| <i>S.lemnae</i>          | SLe_P | AED86993.1     |   | 923  | 89% | 0.0 | 73% |
|                          |       |                | R | 922  | 93% | 0.0 | 72% |
| <i>E.forcardii</i>       | EFo_P | AAP51165.1     |   | 923  | 91% | 0.0 | 72% |
|                          |       |                | R | 921  | 93% | 0.0 | 72% |
| <i>S.nova</i>            | SNo_P | AAB04940.1     |   | 919  | 89% | 0.0 | 73% |
|                          |       |                | R | 920  | 94% | 0.0 | 73% |
| <i>E.nobili</i>          | Eno_P | ABI23727.1     |   | 916  | 89% | 0.0 | 72% |
|                          |       |                | R | 914  | 93% | 0.0 | 72% |
| <i>P.marinus</i>         | PMa_E | XP_002780413.1 |   | 1011 | 94% | 0.0 | 75% |
|                          |       |                | R | 1011 | 99% | 0.0 | 75% |
| <i>V.brassicaformis</i>  | VBr_E | CEM31018.1     |   | 1004 | 89% | 0.0 | 78% |
|                          |       |                | R | 1013 | 99% | 0.0 | 75% |
| <i>C.cohnii</i>          | CCo_E | AAM02973.2     |   | 974  | 89% | 0.0 | 75% |
|                          |       |                | R | 976  | 99% | 0.0 | 72% |
| <i>S.invicta</i>         | SIn_E | XP_011173246.1 |   | 973  | 94% | 0.0 | 72% |
|                          |       |                | R | 973  | 99% | 0.0 | 72% |
| <i>C.biroi</i>           | Cbi_E | XP_011348101.1 |   | 970  | 89% | 0.0 | 75% |
|                          |       |                | R | 972  | 99% | 0.0 | 72% |
| <i>P.minimum</i>         | PMi_E | AEV66161.1     |   | 968  | 89% | 0.0 | 74% |
|                          |       |                | R | 970  | 99% | 0.0 | 72% |
| <i>V.emeryi</i>          | VEm_E | XP_011862691.1 |   | 967  | 89% | 0.0 | 75% |
|                          |       |                | R | 972  | 99% | 0.0 | 72% |
| <i>P.dominula</i>        | PDo_E | XP_015174687.1 |   | 967  | 89% | 0.0 | 75% |
|                          |       |                | R | 970  | 94% | 0.0 | 75% |
| <i>A.echinatior</i>      | AEc_E | XP_011059681.1 |   | 964  | 89% | 0.0 | 75% |
|                          |       |                | R | 967  | 99% | 0.0 | 72% |
| <i>A.mellifera</i>       | AMe_E | NP_001153544.1 |   | 963  | 90% | 0.0 | 75% |
|                          |       |                | R | 964  | 99% | 0.0 | 72% |
| <i>T.zeteki</i>          | TZe_E | KYQ52133.1     |   | 962  | 89% | 0.0 | 75% |
|                          |       |                | R | 969  | 99% | 0.0 | 72% |
| <i>L.humile</i>          | LHu_E | XP_012228066.1 |   | 961  | 89% | 0.0 | 75% |
|                          |       |                | R | 966  | 99% | 0.0 | 72% |
| <i>Loa loa</i>           | LLo_E | XP_003138751.1 |   | 961  | 95% | 0.0 | 71% |
|                          |       |                | R | 961  | 99% | 0.0 | 72% |
| <i>C.costatus</i>        | CCo_E | KYN05451.1     |   | 959  | 89% | 0.0 | 75% |
|                          |       |                | R | 963  | 99% | 0.0 | 72% |
| <i>C.elegans</i>         | CEl_E | NP_503068.1    |   | 952  | 89% | 0.0 | 74% |
|                          |       |                | R | 959  | 99% | 0.0 | 72% |
| <i>P.tepidariorum</i>    | Pte_E | XP_015908911.1 |   | 950  | 89% | 0.0 | 74% |
|                          |       |                | R | 952  | 99% | 0.0 | 71% |
| <i>F.chinensis</i>       | FCh_E | AAW71958.1     |   | 950  | 89% | 0.0 | 74% |
|                          |       |                | R | 955  | 99% | 0.0 | 71% |
| <i>T.Cornetzi</i>        | TCO_E | KYN15760.1     |   | 964  | 89% | 0.0 | 75% |
|                          |       |                | R | 966  | 99% | 0.0 | 72% |

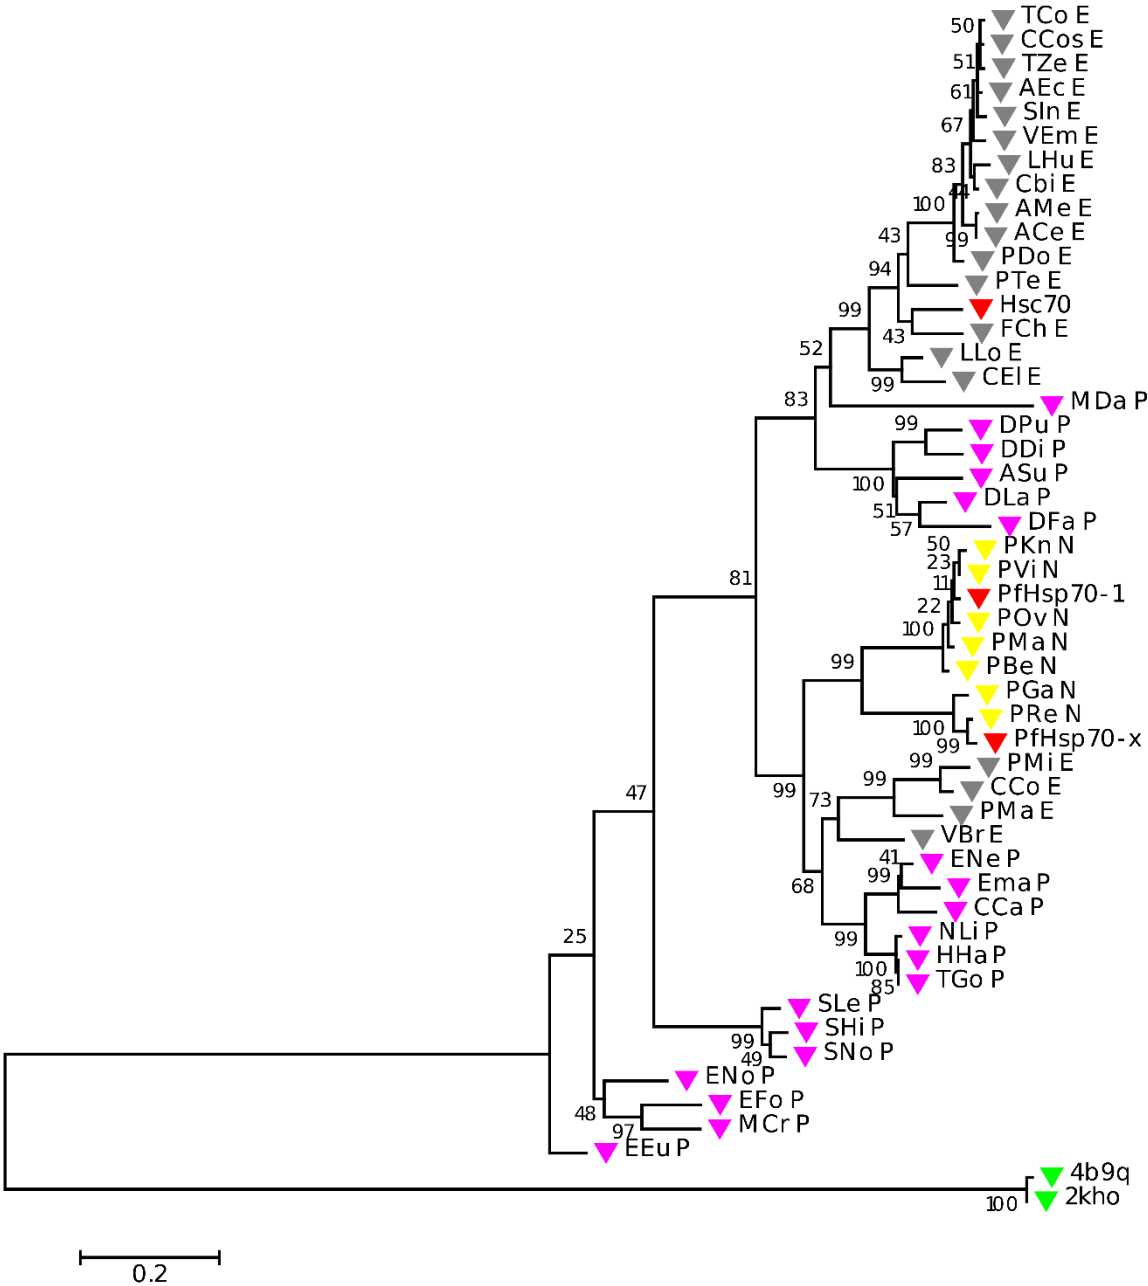

**Figure S1: Classification of Hsp70 proteins using MEGA6:** Rectangular representation of the phylogenetic tree constructed using Le and Gascuel: Gamma distributed (LG+G) substitution model. 1000 bootstrap replications were performed. Target sequences (PfHsp70-1, PfHsp70-x and Hsc70) are indicated in red. The scale bar represents 0.2 amino acid substitutions per site.

27 **Table S2: Template identification and structure validation results:** (A) Tabulated  
 28 summary of template-target sequence identity, query coverage, and template resolution  
 29 values obtained using PRIMO web server. (B) Tabulated results of z-DOPE, PROCHECK  
 30 Ramachandran plot, and VERIFY3D structure validation tools.

31 (A)

| Template Identification results |               |          |          |            |
|---------------------------------|---------------|----------|----------|------------|
| Protein                         | Conformation  | Identity | Coverage | Resolution |
| PfHsp70-x                       | 4b9q (Open)   | 50%      | 85%      | 2.40       |
|                                 | 2kho (Closed) | 49%      | 88%      | -          |
| PfHsp70-1                       | 4b9q (Open)   | 48%      | 88%      | 2.40       |
|                                 | 2kho (Closed) | 48%      | 89%      | -          |
| Hsc70                           | 4b9q (Open)   | 51%      | 85%      | 2.40       |
|                                 | 2kho (Closed) | 52%      | 85%      | -          |

32 (B)

| Structure validation results |               |              |                                                          |                                                                    |                                                                    |                                                            |          |         |
|------------------------------|---------------|--------------|----------------------------------------------------------|--------------------------------------------------------------------|--------------------------------------------------------------------|------------------------------------------------------------|----------|---------|
| Protein                      | Conformation  | Z-Dope score | PROCHECK (Ramachandran Plot)                             |                                                                    |                                                                    |                                                            | VERIFY3D |         |
|                              |               |              | Number of residues in favoured region (Percentage value) | Number of residues in additional allowed region (Percentage value) | Number of residues in generously allowed region (Percentage value) | Number of residues in disallowed region (Percentage value) | Score    | Comment |
| PfHsp70-x                    | 4b9q (Open)   | -1.20        | 95.20%                                                   | 4.40%                                                              | 0.20%                                                              | 0.20%                                                      | 87.19%   | Pass    |
|                              | 2kho (Closed) | -0.59        | 93.00%                                                   | 5.90%                                                              | 0.70%                                                              | 0.40%                                                      | 90.63%   | Pass    |
| PfHsp70-1                    | 4b9q (Open)   | -1.10        | 93.80%                                                   | 4.70%                                                              | 1.10%                                                              | 0.40%                                                      | 91.28%   | Pass    |
|                              | 2kho (Closed) | -0.51        | 92.90%                                                   | 5.50%                                                              | 1.30%                                                              | 0.40%                                                      | 88.32%   | Pass    |
| Hsc70                        | 4b9q (Open)   | -1.19        | 94.70%                                                   | 4.80%                                                              | 0.50%                                                              | 0.00%                                                      | 93.07%   | Pass    |
|                              | 2kho (Closed) | -0.56        | 94.10%                                                   | 4.80%                                                              | 0.50%                                                              | 0.50%                                                      | 83.99%   | Pass    |

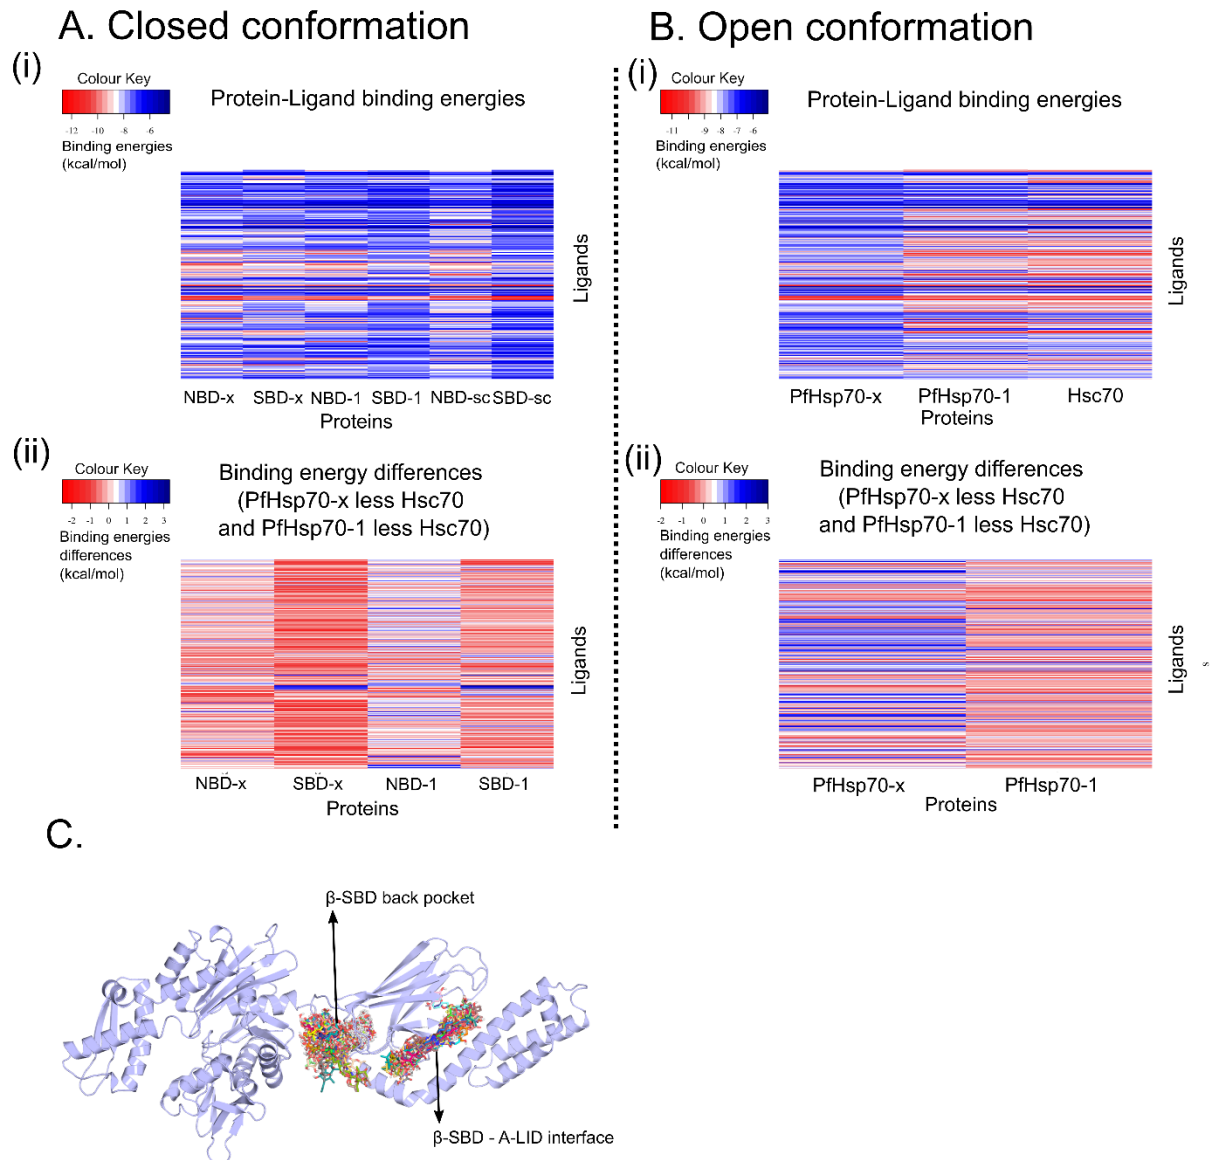

**Figure S2: Post-docking analysis:** **A (i):** All closed conformation proteins versus all ligands: Heatmap showing protein-ligand binding energies. **A (ii):** Heatmap showing protein-ligand binding energy differences domain-wise between parasitic (PfHsp70-x, PfHsp70-1) and human (Hsc70) proteins. **B (i):** All open conformation proteins versus all ligands: Heatmap showing protein-ligand binding energies. **B (ii):** Heatmap displaying protein-ligand binding energy differences between parasitic and human proteins. Heatmaps were coloured from red (most negative energy) to blue (most positive energy). **C:** PfHsp70-x model depicting the two distinct ligand-binding sites identified from docking simulations in the substrate binding domain:  $\beta$ -SBD back pocket and  $\beta$ -SBD – A-LID interface.

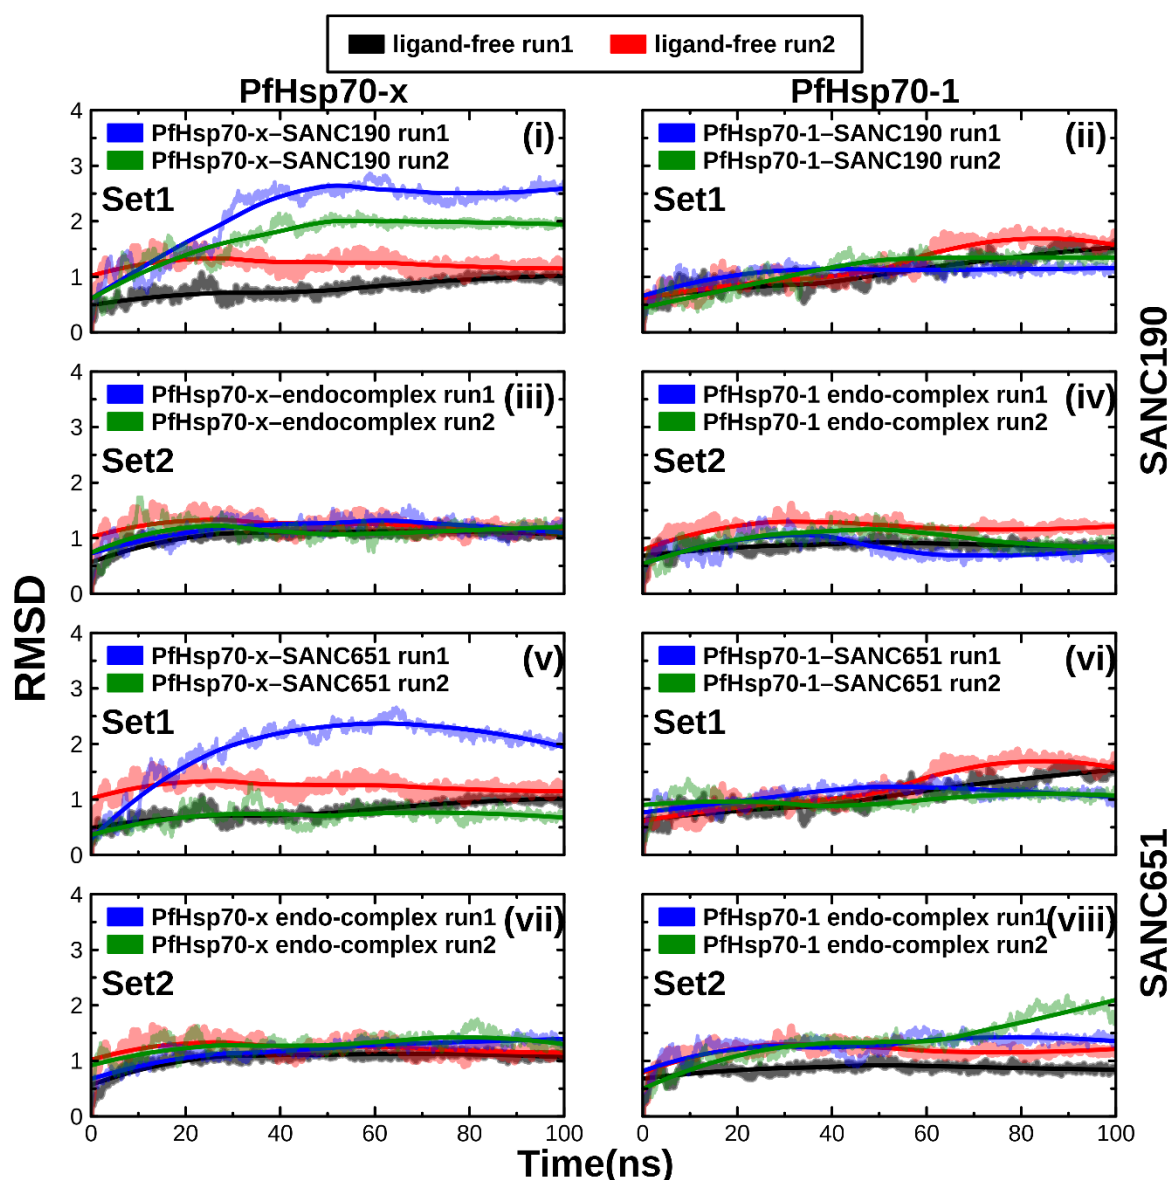

**Figure S3: Backbone atoms RMSDs of ligand-bound and ligand-free PfHsp70-x and PfHsp70-1 relative to the starting structure.**

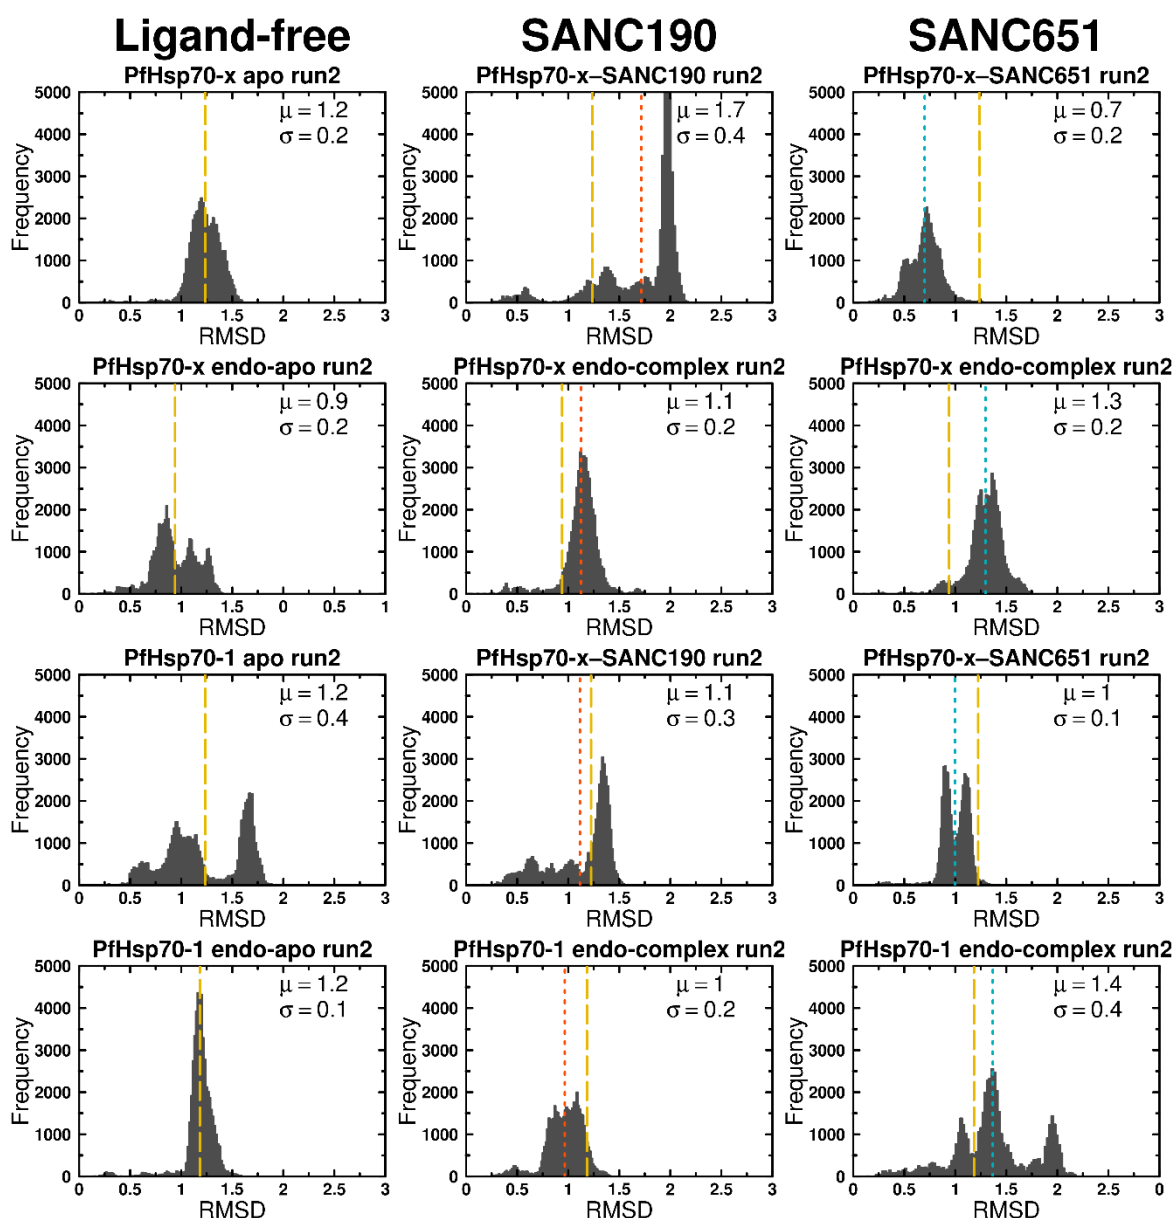

**Figure S4: RMSD calculations of duplicate trajectories:** Histograms of protein backbone RMSDs versus frequency of occurrence. Dotted lines represent positions of the mean value. Color key: Yellow: ligand-free, Red: SANC190-bound, Blue: SANC651-bound.



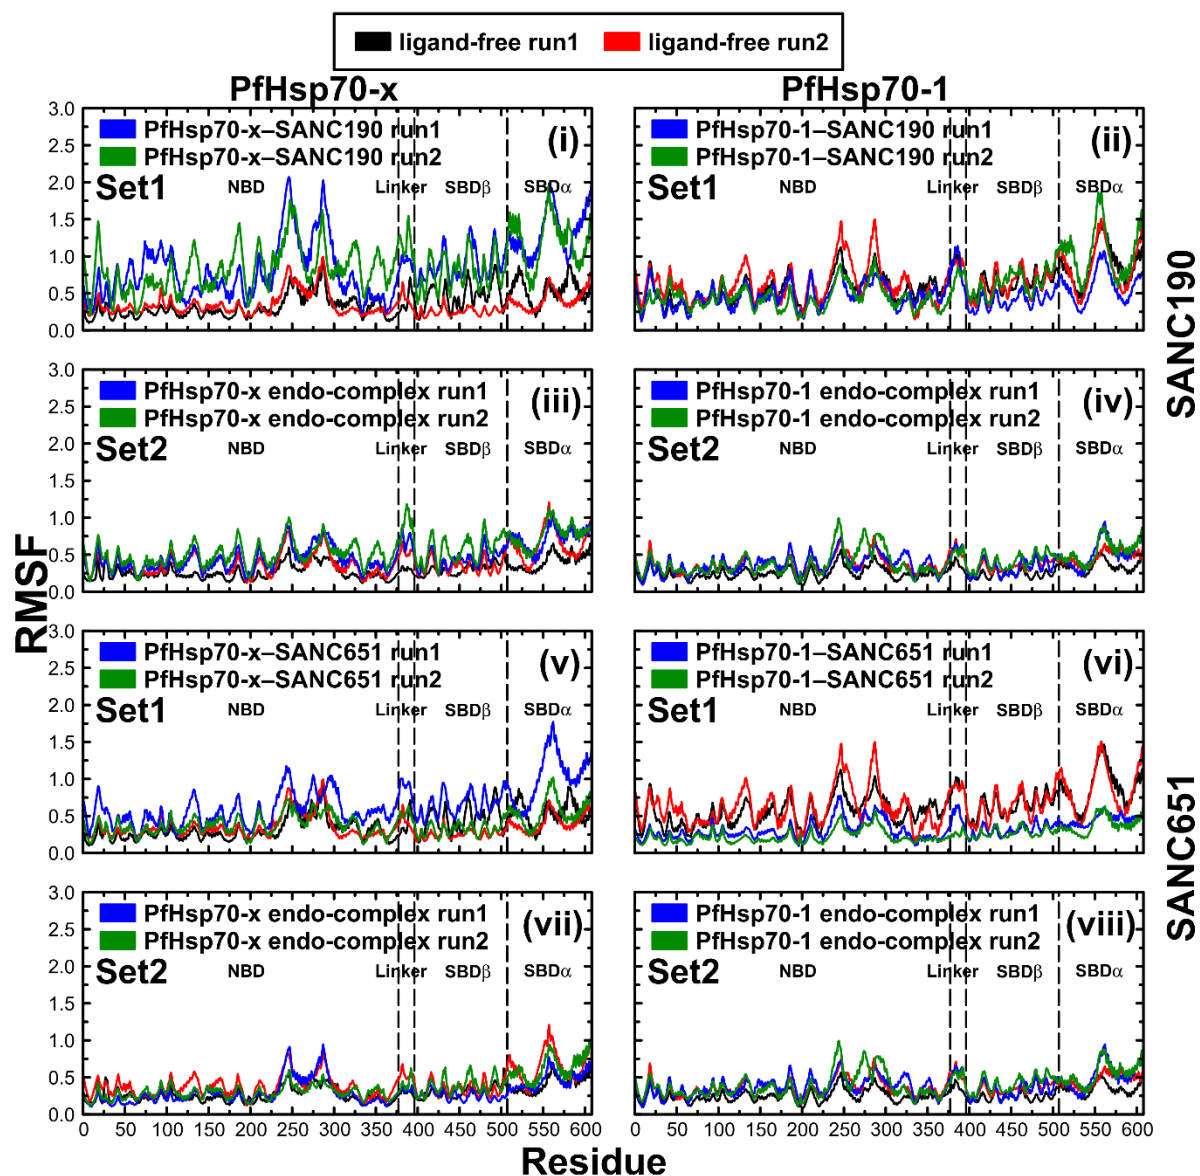

**Figure S5: The root-mean-square fluctuation (RMSF) profiles of PfHsp70-x and PfHsp70-1 computed based on Cα atom positions.**

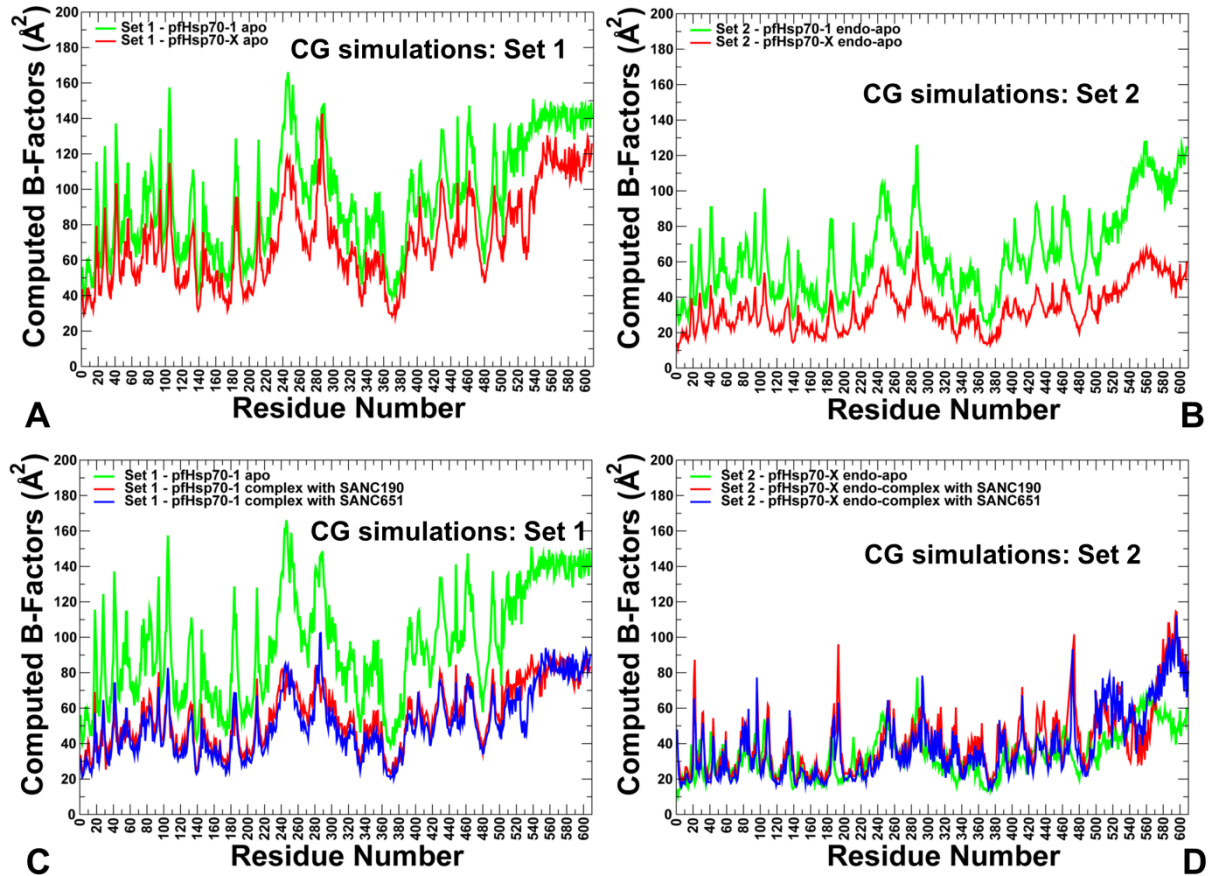

**Figure S6:** CG conformational dynamics profiles and of the PfHsp70 protein structures (A) The computed B-factors from CG MC dynamics simulations for Set 1 : PfHsp70-1 (apo) in green lines and PfHsp70-x (apo) in red lines. (B) Set 2: PfHsp70-1 (endo-apo) in green lines and PfHsp70-x (endo-apo) in red lines. (C) Set 1: PfHsp70-1 (apo) in green, PfHsp70-1 complex with SANC190 and SANC651 in red and blue lines respectively (D) set 2 : PfHsp70-x (endo-apo) in green, PfHsp70-x complexes with SANC190 and SANC651 in red and blue lines respectively.

**Table S3: Principal Component Analysis.** Tabulated summary of the top two principal components and the associated percentage variance. Trace values (cumulative sum of eigenvalues) are also shown. (A) PfHsp70-x, (B) PfHsp70-1.

(A)

|           | Protein systems                       |      | Percentage variance accounted by each component |         | Trace value / cumulative sum of eigenvalues (nm <sup>2</sup> ) |
|-----------|---------------------------------------|------|-------------------------------------------------|---------|----------------------------------------------------------------|
|           |                                       |      | PC1 (%)                                         | PC2 (%) |                                                                |
| PfHsp70-x | PfHsp70-x apo                         | Run1 | 65.37                                           | 12.80   | 309.46                                                         |
|           |                                       | Run2 | 38.03                                           | 22.96   | 256.37                                                         |
|           | PfHsp70-x - SANC190 complex           | Run1 | 79.37                                           | 9.34    | 1728.48                                                        |
|           |                                       | Run2 | 73.92                                           | 14.02   | 1631.52                                                        |
|           | PfHsp70-x - SANC651 complex           | Run1 | 71.41                                           | 13.17   | 942.74                                                         |
|           |                                       | Run2 | 56.43                                           | 24.96   | 332.74                                                         |
|           | PfHsp70-x endo-apo                    | Run1 | 47.57                                           | 25.79   | 176.78                                                         |
|           |                                       | Run2 | 66.99                                           | 14.44   | 370.79                                                         |
|           | SANC190- bound PfHsp70-x endo-complex | Run1 | 59.82                                           | 23.58   | 484.48                                                         |
|           |                                       | Run2 | 63.65                                           | 16.40   | 653.18                                                         |
|           | SANC651- bound PfHsp70-x endo-complex | Run1 | 68.92                                           | 10.17   | 215.47                                                         |
|           |                                       | Run2 | 45.96                                           | 26.14   | 294.07                                                         |

74 (B)

75

|           | Protein systems                       |      | Percentage variance accounted by each component |         | Trace value / cumulative sum of eigenvalues (nm <sup>2</sup> ) |
|-----------|---------------------------------------|------|-------------------------------------------------|---------|----------------------------------------------------------------|
|           |                                       |      | PC1 (%)                                         | PC2 (%) |                                                                |
| PfHsp70-1 | PfHsp70-1 apo                         | Run1 | 67.24                                           | 14.65   | 821.34                                                         |
|           |                                       | Run2 | 77.61                                           | 8.51    | 929.517                                                        |
|           | PfHsp70-1 - SANC190 complex           | Run1 | 70.95                                           | 15.99   | 494.78                                                         |
|           |                                       | Run2 | 67.82                                           | 11.46   | 786.40                                                         |
|           | PfHsp70-1 - SANC651 complex           | Run1 | 50.92                                           | 24.20   | 225.78                                                         |
|           |                                       | Run2 | 40.80                                           | 16.97   | 140.50                                                         |
|           | PfHsp70-1 endo-apo                    | Run1 | 45.90                                           | 20.00   | 140.28                                                         |
|           |                                       | Run2 | 39.30                                           | 20.60   | 278.88                                                         |
|           | SANC190- bound PfHsp70-1 endo-complex | Run1 | 57.46                                           | 26.43   | 313.76                                                         |
|           |                                       | Run2 | 48.64                                           | 22.07   | 359.72                                                         |
|           | SANC651- bound PfHsp70-1 endo-complex | Run1 | 68.23                                           | 14.32   | 490.66                                                         |
|           |                                       | Run2 | 73.42                                           | 12.72   | 477.48                                                         |

76

## PfHsp70-x

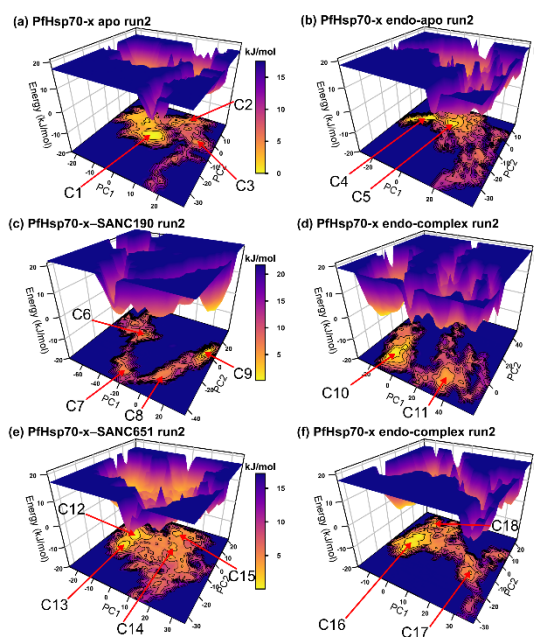

## PfHsp70-1

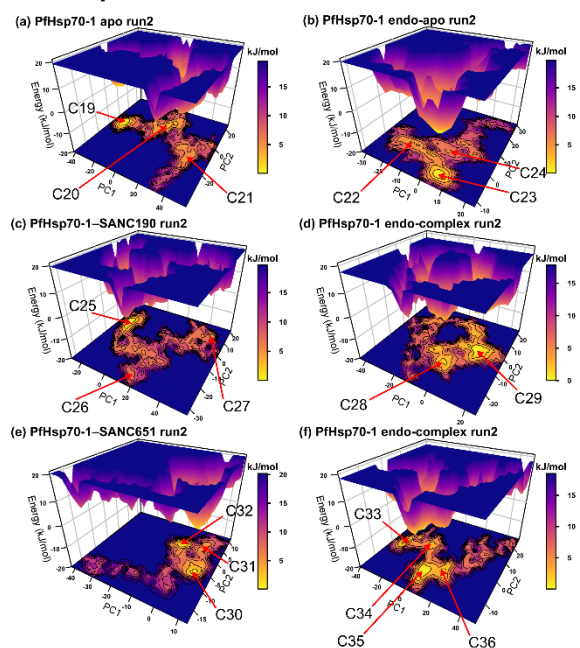

Ligand-free

SANC190

SANC651

77

78

79 **Figure S7: Free energy landscapes of PfHsp70-x and PfHsp70-1 (duplicate runs)**  
 80 **computed as a function of PC1 and PC2.**

**Table S4: Binding free energy values of protein-ligand complexes.** The table displays contributions of each energy term to the total binding free energy. Calculations were carried out using the MMPBSA approach.

| Protein   | Protein-ligand complex               |      | Energy terms            |                          |                           |                              | Binding free energy<br>$\Delta G_{\text{binding}}$ (kJmol <sup>-1</sup> ) |
|-----------|--------------------------------------|------|-------------------------|--------------------------|---------------------------|------------------------------|---------------------------------------------------------------------------|
|           |                                      |      | $\Delta E_{\text{vdW}}$ | $\Delta E_{\text{elec}}$ | $\Delta G_{\text{polar}}$ | $\Delta G_{\text{nonpolar}}$ |                                                                           |
| PfHsp70-x | PfHsp70-x - SANC190 complex          | Run1 | -106.112 ± 0.238        | -6.006 ± 0.128           | 44.659 ± 0.233            | -11.585 ± 0.017              | -79.050 ± 0.278                                                           |
|           |                                      | Run2 | -111.228 ± 0.196        | -2.771 ± 0.061           | 33.134 ± 0.193            | -11.507 ± 0.016              | -92.365 ± 0.253                                                           |
|           | SANC190-bound PfHsp70-x endo-complex | Run1 | -125.920 ± 0.158        | 1.616 ± 0.040            | 37.597 ± 0.104            | -11.464 ± 0.012              | -98.168 ± 0.190                                                           |
|           |                                      | Run2 | -112.054 ± 0.203        | -0.157 ± 0.040           | 33.234 ± 0.223            | -10.861 ± 0.015              | -89.817 ± 0.321                                                           |
|           | PfHsp70-x - SANC651 complex          | Run1 | -134.856 ± 0.205        | -14.755 ± 0.171          | 70.573 ± 0.343            | -12.617 ± 0.014              | -91.645 ± 0.335                                                           |
|           |                                      | Run2 | -106.137 ± 0.238        | -17.585 ± 0.164          | 60.586 ± 0.480            | -11.723 ± 0.018              | -74.863 ± 0.450                                                           |
|           | SANC651-bound PfHsp70-x endo-complex | Run1 | -104.138 ± 0.221        | -15.297 ± 0.233          | 61.269 ± 0.261            | -12.551 ± 0.015              | -70.696 ± 0.272                                                           |
|           |                                      | Run2 | -108.997 ± 0.234        | -3.818 ± 0.137           | 32.190 ± 0.163            | -12.015 ± 0.018              | -92.649 ± 0.242                                                           |
| PfHsp70-1 | PfHsp70-1 - SANC190 complex          | Run1 | -98.130 ± 0.207         | -0.261 ± 0.084           | 53.949 ± 0.308            | -12.044 ± 0.017              | -56.488 ± 0.314                                                           |
|           |                                      | Run2 | -107.476 ± 0.218        | 0.610 ± 0.112            | 34.378 ± 0.268            | -11.671 ± 0.016              | -84.151 ± 0.298                                                           |
|           | SANC190-bound PfHsp70-1 endo-complex | Run1 | -123.747 ± 0.163        | 8.184 ± 0.053            | 21.830 ± 0.216            | -11.197 ± 0.012              | -104.929 ± 0.241                                                          |
|           |                                      | Run2 | -99.403 ± 0.171         | 1.096 ± 0.058            | 29.298 ± 0.191            | -11.485 ± 0.016              | -80.500 ± 0.229                                                           |
|           | PfHsp70-1 - SANC651 complex          | Run1 | -114.367 ± 0.193        | -5.571 ± 0.106           | 33.399 ± 0.259            | -11.350 ± 0.014              | -97.887 ± 0.274                                                           |
|           |                                      | Run2 | -105.896 ± 0.270        | -7.755 ± 0.120           | 40.257 ± 0.241            | -12.088 ± 0.013              | -85.473 ± 0.258                                                           |
|           | SANC651-bound PfHsp70-1 endo-complex | Run1 | -121.057 ± 0.234        | -6.095 ± 0.130           | 55.903 ± 0.182            | -12.395 ± 0.015              | -83.658 ± 0.288                                                           |
|           |                                      | Run2 | -86.751 ± 1.341         | -1.270 ± 0.096           | 32.708 ± 0.945            | -8.557 ± 0.132               | -63.977 ± 1.386                                                           |

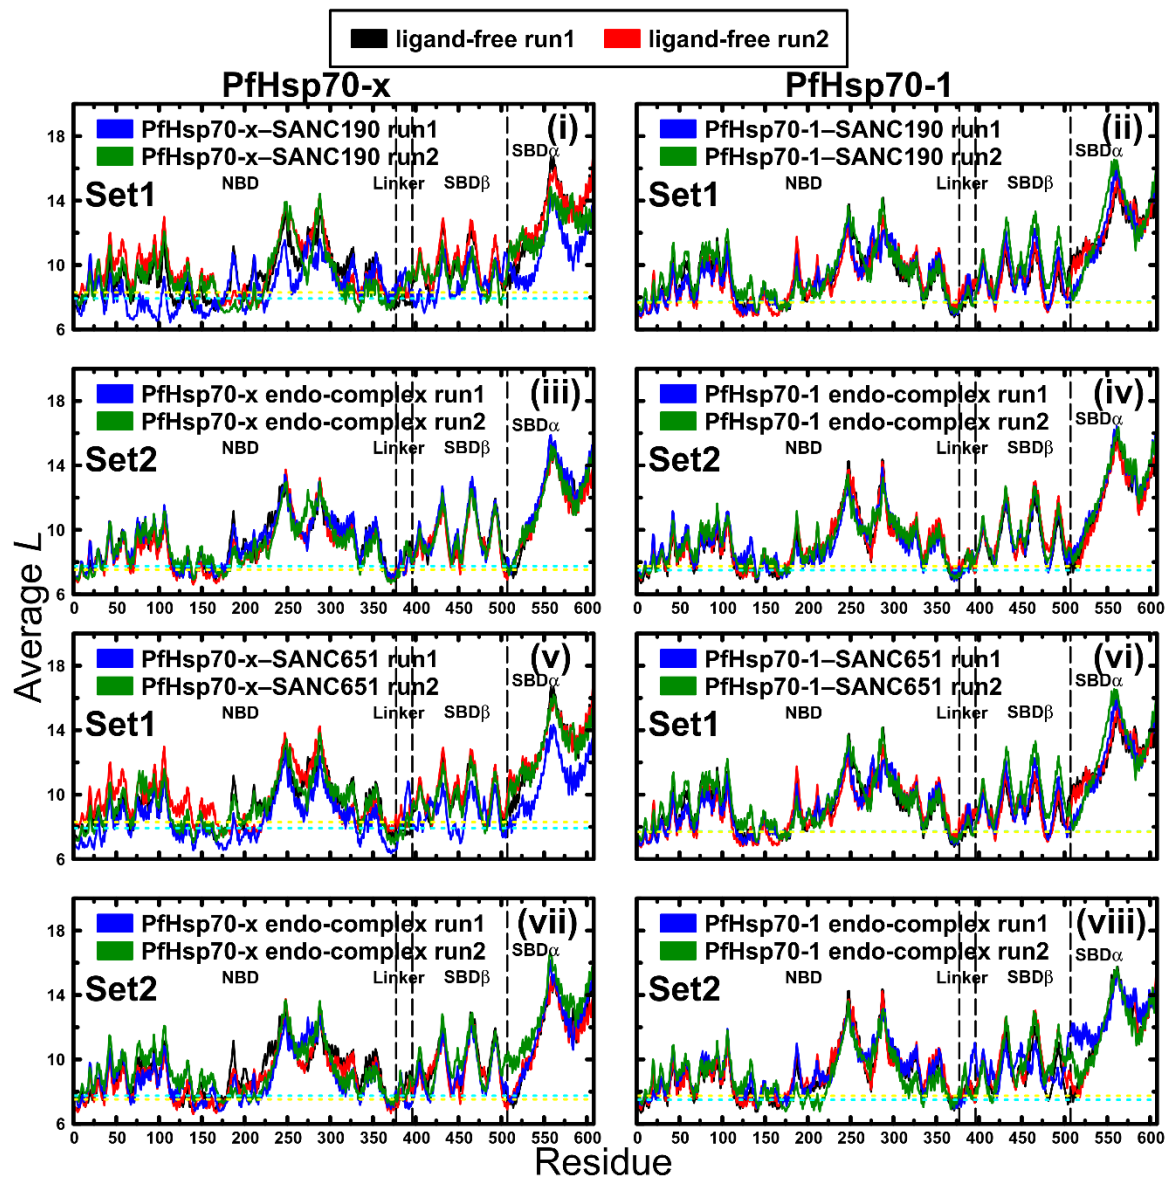

Figure S8: Per residue Average  $L$  plots comparing ligand-free and ligand-bound systems.

**Table S5: Dynamic residue network analysis:** Tabulated threshold values applied in identifying low average  $L$  regions.

| Protein   | System                                      | Threshold values                                  |                                                    |
|-----------|---------------------------------------------|---------------------------------------------------|----------------------------------------------------|
|           |                                             | Average $L$<br>(One standard deviation from mean) | Average $BC$<br>(Two standard deviation from mean) |
| PfHsp70-x | PfHsp70-x apo (set1)                        | 8.156                                             | 0.088                                              |
|           | PfHsp70-x endo-apo (set2)                   | 7.654                                             | 0.087                                              |
|           | PfHsp70-x - SANC190 complex (set1)          | 7.841                                             | 0.077                                              |
|           | SANC190-bound PfHsp70-x endo-complex (set2) | 7.761                                             | 0.084                                              |
|           | PfHsp70-x - SANC651 complex (set1)          | 7.690                                             | 0.086                                              |
|           | SANC651-bound PfHsp70-x-endo-complex (set2) | 7.922                                             | 0.097                                              |
| PfHsp70-1 | PfHsp70-1 apo (set1)                        | 7.719                                             | 0.098                                              |
|           | PfHsp70-1 endo-apo (set2)                   | 7.633                                             | 0.083                                              |
|           | PfHsp70-1-SANC190 complex (set1)            | 7.840                                             | 0.080                                              |
|           | SANC190-bound PfHsp70-1 endo-complex (set2) | 7.736                                             | 0.084                                              |
|           | PfHsp70-1-SANC651 complex (set1)            | 7.624                                             | 0.084                                              |
|           | SANC651-bound PfHsp70-1-endo-complex (set2) | 7.904                                             | 0.091                                              |



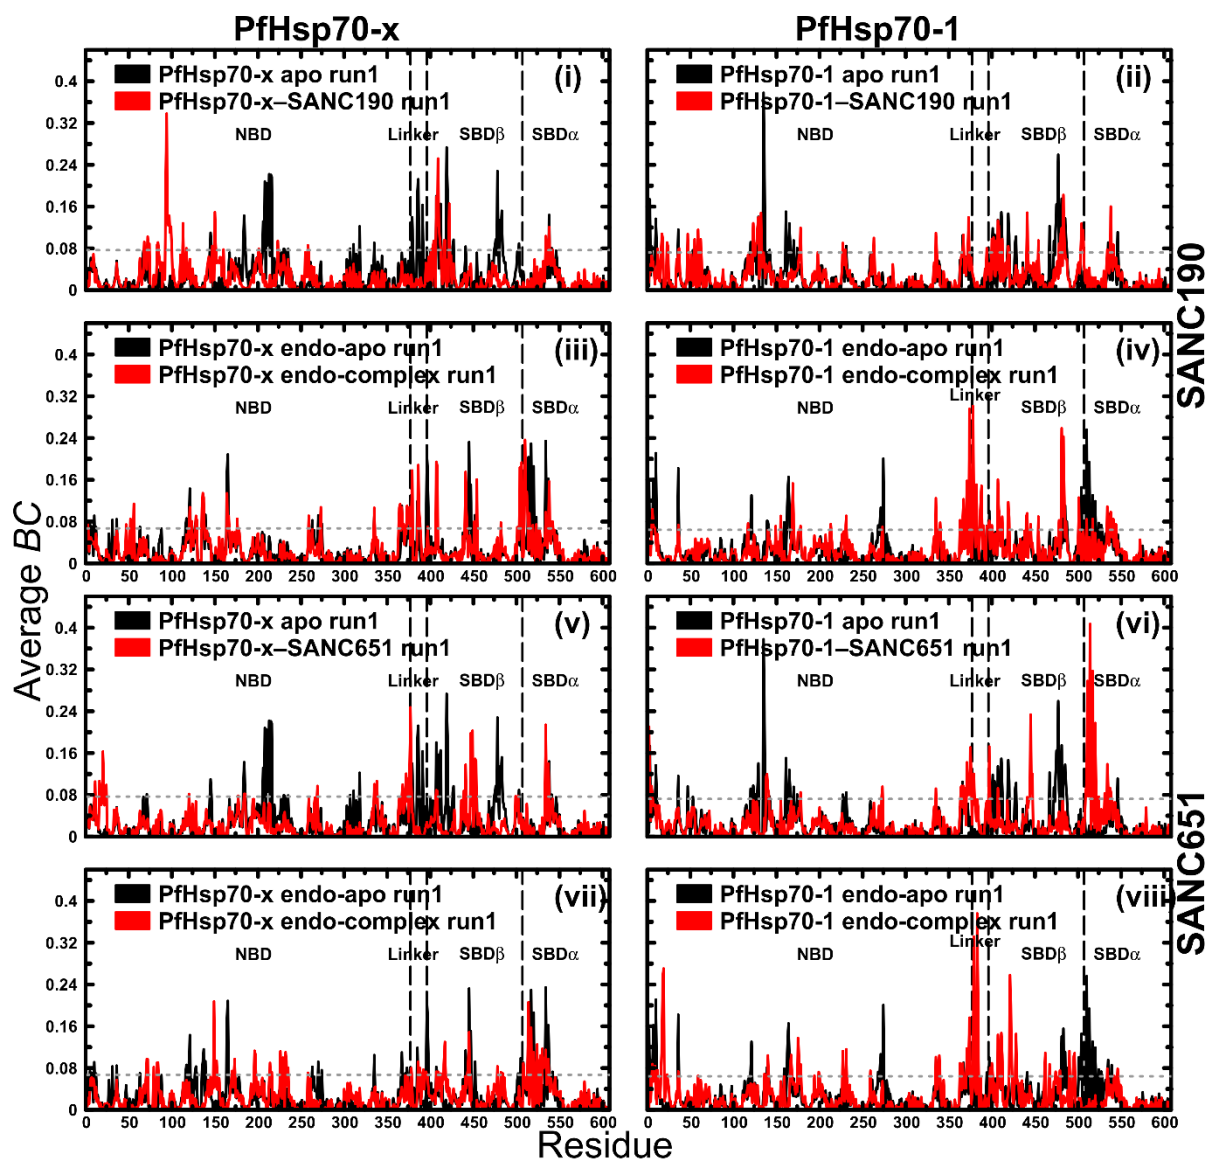

97 B)

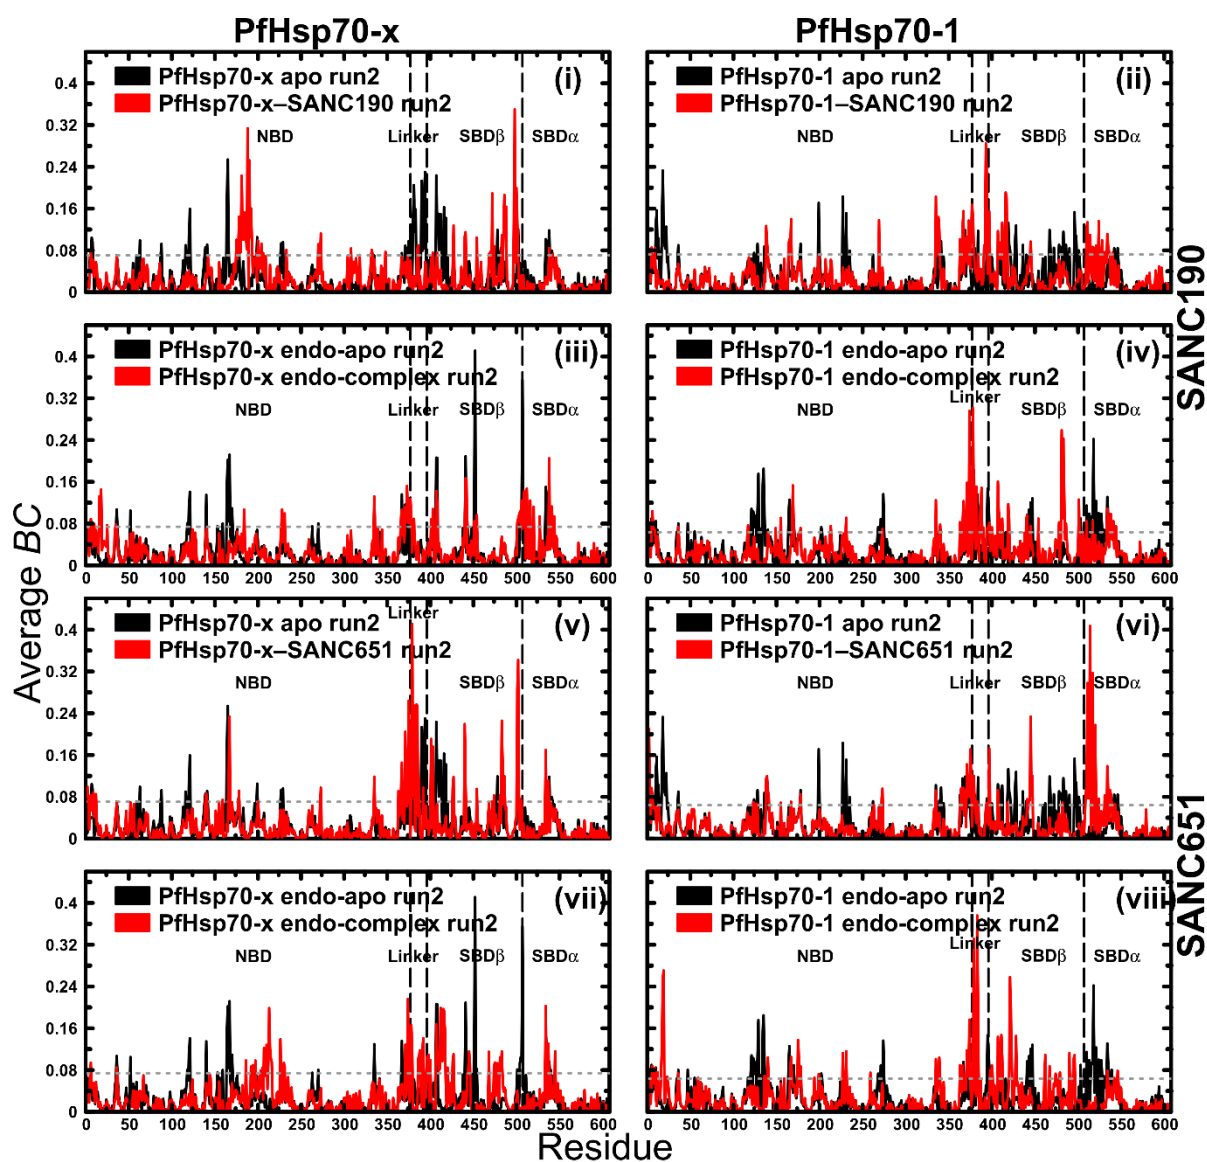

Figure S9: Per residues Average *BC* indices. (A): Run 1 trajectories, (B): Run 2 trajectories. Colour key: Black: Ligand-free, Red: Ligand-bound.

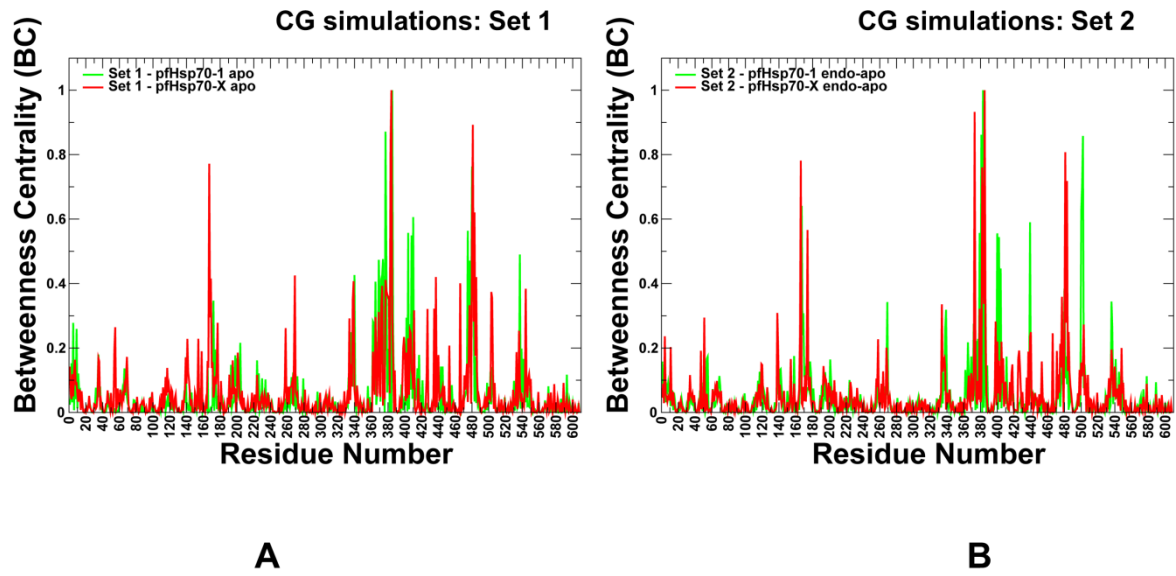

**Figure S10:** The dynamic network analysis of the PfHsp70 protein structures using CG MC dynamics simulations. (A) The BC profiles for Set 1 : PfHsp70-1 (apo) and PfHsp70-x (apo) in green and red lines respectively. (B) The BC profiles for Set 2: PfHsp70-1 (endo-apo) and PfHsp70-x (endo-apo) in green and red lines respectively.

108 **Table S6: Pearson's correlation coefficient values:** Pairwise comparisons of average *BC*,  
109 average *L* and RMSF.  
110

| Protein   | System                                   | Run  | <i>L</i> vs<br>RMSF<br>(100ns) | <i>L</i> <sup>-1</sup> vs<br><i>BC</i> | RMSF-<br><sup>1</sup><br>(100ns)<br>vs <i>BC</i> |
|-----------|------------------------------------------|------|--------------------------------|----------------------------------------|--------------------------------------------------|
| PfHsp70-x | PfHsp70-x apo                            | Run1 | 0.61                           | 0.28                                   | 0.15                                             |
|           |                                          | Run2 | 0.64                           | 0.31                                   | 0.23                                             |
|           | PfHsp70-x endo-apo                       | Run1 | 0.72                           | 0.48                                   | 0.22                                             |
|           |                                          | Run2 | 0.62                           | 0.45                                   | 0.11                                             |
|           | PfHsp70-x -SANC190 complex               | Run1 | 0.70                           | 0.55                                   | 0.04                                             |
|           |                                          | Run2 | 0.56                           | 0.47                                   | 0.15                                             |
|           | SANC190- bound PfHsp70-x<br>endo-complex | Run1 | 0.57                           | 0.51                                   | 0.11                                             |
|           |                                          | Run2 | 0.52                           | 0.52                                   | 0.18                                             |
|           | PfHsp70-x -SANC651 complex               | Run1 | 0.74                           | 0.52                                   | 0.11                                             |
|           |                                          | Run2 | 0.62                           | 0.45                                   | 0.16                                             |
|           | SANC651- bound PfHsp70-x<br>endo-complex | Run1 | 0.71                           | 0.44                                   | 0.03                                             |
|           |                                          | Run2 | 0.81                           | 0.44                                   | 0.20                                             |
| PfHsp70-1 | PfHsp70-1 apo                            | Run1 | 0.58                           | 0.41                                   | 0.16                                             |
|           |                                          | Run2 | 0.50                           | 0.45                                   | 0.17                                             |
|           | PfHsp70-1 endo-apo                       | Run1 | 0.58                           | 0.44                                   | 0.16                                             |
|           |                                          | Run2 | 0.52                           | 0.50                                   | 0.12                                             |
|           | PfHsp70-1 -SANC190 complex               | Run1 | 0.41                           | 0.50                                   | 0.19                                             |
|           |                                          | Run2 | 0.68                           | 0.47                                   | 0.12                                             |
|           | SANC190- bound PfHsp70-1<br>endo-complex | Run1 | 0.60                           | 0.43                                   | 0.22                                             |
|           |                                          | Run2 | 0.60                           | 0.47                                   | 0.15                                             |
|           | PfHsp70-1 -SANC651 complex               | Run1 | 0.60                           | 0.48                                   | 0.12                                             |
|           |                                          | Run2 | 0.79                           | 0.49                                   | 0.20                                             |
|           | SANC651- bound PfHsp70-1<br>endo-complex | Run1 | 0.59                           | 0.46                                   | 0.03                                             |
|           |                                          | Run2 | 0.71                           | 0.40                                   | 0.08                                             |

**Table S7: Tabulated summary of PfHsp70-x – SANC190 complex and PfHsp70-x – SANC651 complex residues that exhibited substantial changes in average betweenness centrality (BC) index.** Residues were identified from average values of run1 and run2. Residue numbering corresponds to *E. coli* DnaK sequence (UniProtKB ID: P0A6Y8). Underlined text corresponds to allosteric communication hubs thought to promote opening conformational transitions in *E. coli* Hsp70 from force perturbation experiments [1] .

| Protein                     | Change in average BC index                     | Residues                                                                                                                                                                                                                                                                                               |
|-----------------------------|------------------------------------------------|--------------------------------------------------------------------------------------------------------------------------------------------------------------------------------------------------------------------------------------------------------------------------------------------------------|
| PfHsp70-x – SANC190 complex | Positive change (Decreased residue centrality) | ASN164, VAL165, LEU208, ASP210, ILE212, PHE213, VAL215, LYS216, <u>ALA375</u> , <u>GLY379</u> , ASP380, GLN381, SER383, VAL385, LEU390, <u>LEU391</u> , ASP392, VAL393, CYS394, <u>MET407</u> , <u>ILE411</u> , <u>GLU412</u> , PRO418, THR419, LYS420, <u>ASP478</u> , GLY481, ILE482, ASN502, ASP503 |
|                             | Negative change (Increased residue centrality) | SER93, ASP94, <u>GLY95</u> , <u>LYS96</u> , <u>PRO97</u> , GLN150, LEU181, GLU188, ASN190, GLU472, LEU488, ILE498, <u>ILE500</u>                                                                                                                                                                       |
| PfHsp70-x – SANC651 complex | Positive change (Decreased residue centrality) | <u>ASN164</u> , <u>VAL165</u> , LEU208, ASP210, PHE213, VAL215, LYS216, SER383, LYS386, LEU390, <u>LEU391</u> , VAL393, CYS394, <u>MET407</u> , <u>LYS409</u> , <u>ILE411</u> , <u>GLU412</u> , <u>THR416</u> , PRO418, THR419, LYS420, <u>ASP478</u> , ILE482                                         |
|                             | Negative change (Increased residue centrality) | VAL20, ARG167, ALA371, <u>VAL372</u> , ALA374, <u>ALA375</u> , <u>ILE376</u> , LEU377, <u>GLY379</u> , ALA384, <u>GLU401</u> , <u>TYR440</u> , <u>THR447</u> , <u>ASP449</u> , <u>LEU452</u> , <u>LEU453</u> , <u>THR501</u> , <u>ASN502</u> , <u>GLU534</u> , <u>ASN537</u>                           |

## PfHsp70-x - SANC190 complex

(i)  
run1

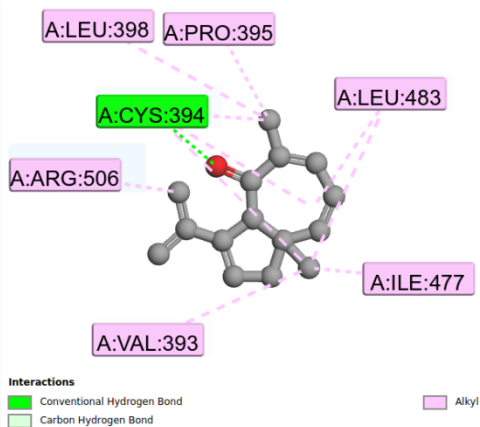

(ii)  
run2

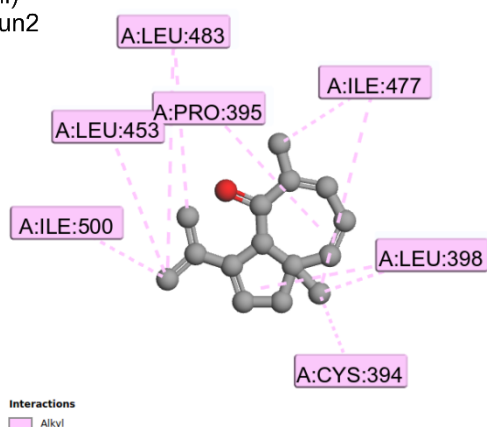

## PfHsp70-x - SANC651 complex

(iii)  
run1

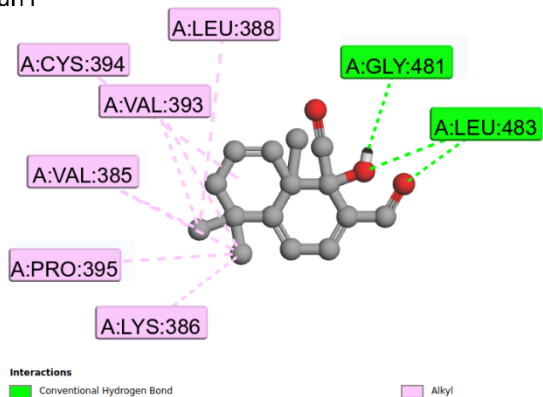

(iv)  
run2

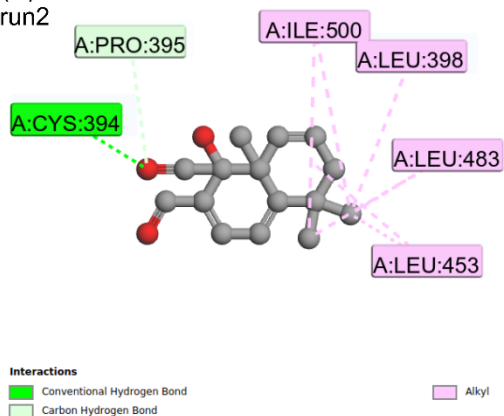

120

121

122 **Figure S11: Molecular interactions of PfHsp70-x – SANC190 and PfHsp70-x –**  
 123 **SANC651 complexes visualised using Discovery studio.**

124

**Table S8: A table summary of residues governing protein-ligand binding affinities.**  
Residues contributing  $> \pm 2.5$  kJmol<sup>-1</sup> of the total binding free energy were identified.

| Protein-ligand complex      |      | Per residue contribution to total binding free energy                                  |                                                                                                | Standard deviation |
|-----------------------------|------|----------------------------------------------------------------------------------------|------------------------------------------------------------------------------------------------|--------------------|
|                             |      | Residue                                                                                | Binding free energy (kJmol <sup>-1</sup> )                                                     |                    |
| PfHsp70-x – SANC190 complex | Run1 | GLU441<br>VAL393<br>LEU398<br>LEU483<br>ASN502                                         | 5.4542<br>-5.6279<br>-3.2236<br>-5.2695<br>-2.8591                                             | 0.4711             |
|                             | Run2 | LYS386<br>GLU441<br>LEU398<br>LEU453<br>ILE477<br>ILE482<br>LEU483<br>ASN502           | 3.6877<br>2.5614<br>-2.9697<br>-2.5790<br>-5.2430<br>-2.8791<br>-6.8433<br>-3.4466             | 0.5211             |
| PfHsp70-x – SANC651 complex | Run1 | LYS386<br>GLU441<br>VAL385<br>VAL393<br>LEU398<br>ILE477<br>ASP478<br>ILE482<br>LEU483 | 3.2211<br>17.3190<br>-3.6392<br>-3.1065<br>-4.3608<br>-3.8225<br>-2.5636<br>-2.5450<br>-4.8987 | 0.8722             |
|                             | Run2 | GLU441<br>VAL393<br>LEU398<br>ASP478<br>ASN502                                         | 11.2247<br>-4.5537<br>-2.7407<br>-2.7627<br>-2.6827                                            | 0.6254             |

129 **Video S1: All atom MD simulations:** An accelerated 100ns video of ligand-free PfHsp70-x  
130 (PfHsp70-x apo) .

131

132 **Video S2: All atom MD simulations:** An accelerated 100ns video of PfHsp70-x –  
133 SANC190 complex. Colour code: green: protein; purple: SANC190.

134

135 **Video S3: All atom MD simulations:** An accelerated 100ns video of PfHsp70-x –  
136 SANC651 complex. Colour code: red: protein; yellow: SANC651.

137

138



139   **REFERENCES**

- 140   1.    Penkler, D.; Sensoy, Ö.; Atilgan, C.; Tastan Bishop, Ö. Perturbation-Response  
141       Scanning Reveals Key Residues for Allosteric Control in Hsp70. *J. Chem. Inf. Model.*  
142       **2017**, *57*, 1359–1374, doi:10.1021/acs.jcim.6b00775.

143
